# Supplementary material
Source: MDPI journal article supplement (https://www.mdpi.com/2073-4395/11/11/2214)
Supplement: s1 [file s1]

## Supplementary Materials

### Clover species specific influence on microbial abundance and associated enzyme activities in rhizosphere and non-rhizosphere soils

Martin Brtnický <sup>1,2,3</sup>, Antonín Kintl <sup>1,4</sup>, Tereza Hammerschmiedt <sup>1,2</sup>, Adnan Mustafa <sup>5\*</sup>, Jakub Elbl <sup>4,6</sup>, Jiri Kucerik <sup>3</sup>, Tomas Vyhnánek <sup>7</sup>, Jiri Skladanka <sup>8</sup>, Igor Hunady <sup>4</sup>, Jiri Holatko <sup>1\*</sup>

<sup>1</sup> Department of Agrochemistry, Soil Science, Microbiology and Plant Nutrition, Faculty of AgriSciences, Mendel University in Brno, Zemedelska 1, Brno 61300, Czech Republic; Martin.Brtnicky@seznam.cz (M.B.); tereza.hammerschmiedt@mendelu.cz (T.H.)

<sup>2</sup> Department of Geology and Soil Science, Faculty of Forestry and Wood Technology, Mendel University in Brno, Zemedelska 3, Brno 61300, Czech Republic; Martin.Brtnicky@seznam.cz (M.B.); tereza.hammerschmiedt@mendelu.cz (T.H.)

<sup>3</sup> Institute of Chemistry and Technology of Environmental Protection, Faculty of Chemistry, Brno University of Technology, Purkynova 118, 612 00 Brno, Czech Republic; Martin.Brtnicky@seznam.cz (M.B.); kucerik@fch.vut.cz

<sup>4</sup> Agricultural Research, Ltd., Zahradni 400/1, 664 41 Troubsko, Czech Republic; kintl@vupt.cz (A.K.); jiri.holatko@mendelu.cz

<sup>5</sup> Biology Center CAS, SoWa RI, Na Sadkach 7, 370-05 Ceske Budejovice, Czech Republic; adnanmustafa780@gmail.com

<sup>6</sup> Department of Agrosystems and Bioclimatology, Faculty of AgriSciences, Mendel University in Brno, Zemedelska 1, 61300 Brno, Czech Republic; jakub.elbl@mendelu.cz

<sup>7</sup> Department of Plant Biology, Faculty of AgriSciences, Mendel University in Brno, Zemedelska 1, 61300 Brno, Czech Republic; tomas.vyhnanek@mendelu.cz

<sup>8</sup> Department of Animal Nutrition and Forage Production, Mendel University in Brno, Zemedelska 1, CZ-613 00 Brno, Czech Republic; jiri.skladanka@mendelu.cz (J.S.)

\* Correspondence: adnanmustafa780@gmail.com; jiri.holatko@mendelu.cz e-mail@e-mail.com

**Table. S1** Monthly recorded rainfalls and average temperature on Troubsko locality during the year 2020

| Total rainfalls [mm] | Year  |           | Average temperature [°C] | Year  |           |
|----------------------|-------|-----------|--------------------------|-------|-----------|
| Month                | 2020  | 1981-2010 | Month                    | 2020  | 1981-2010 |
| 1                    | 8.5   | 25        | 1                        | -0.2  | -1.7      |
| 2                    | 27.1  | 23.9      | 2                        | 4.6   | -0.3      |
| 3                    | 25.7  | 31.5      | 3                        | 5.3   | 3.8       |
| 4                    | 20.3  | 32        | 4                        | 9.9   | 9.5       |
| 5                    | 65.4  | 60.5      | 5                        | 12.6  | 14.6      |
| 6                    | 87.2  | 68.7      | 6                        | 18    | 17.4      |
| 7                    | 59    | 71.6      | 7                        | 19.2  | 19.5      |
| 8                    | 105.9 | 63.7      | 8                        | 20.6  | 18.8      |
| 9                    | 81.6  | 48.2      | 9                        | 15    | 14.1      |
| 10                   | 130.1 | 32.1      | 10                       | 10.1  | 8.8       |
| 11                   | 23.4  | 36.4      | 11                       | 4.51  | 3.5       |
| 12                   | 36.8  | 32        | 12                       | 2.4   | -0.6      |
| Whole year sum       | 671   | 525.6     | Year                     | 9     | 8.95      |
| Vegetation period    | 419.4 | 344.7     | Vegetation period        | 15.88 | 15.65     |

Vegetation period: 1. 4.–30. 9.; source of data for long-period 30-year average values (1981–2010): Czech Hydrometeorological Institute.

**Table. S2** Results of two-way analysis of variance ANOVA

| <b>Response: ARS</b>      | <b>Df</b> | <b>Sum Sq</b>           | <b>Mean Sq</b>          | <b>F value</b> | <b>p (&gt;F)</b> |
|---------------------------|-----------|-------------------------|-------------------------|----------------|------------------|
| Plant                     | 4         | 178.49                  | 44.62                   | 176.92         | < 0.001 ***      |
| Sampling place            | 1         | 309.55                  | 309.55                  | 1227.30        | < 0.001 ***      |
| Plant to Sampling place   | 4         | 205.41                  | 51.35                   | 203.61         | < 0.001 ***      |
| Residuals                 | 80        | 20.177                  | 0.252                   |                |                  |
| <b>Response: Ure</b>      | <b>Df</b> | <b>Sum Sq</b>           | <b>Mean Sq</b>          | <b>F value</b> | <b>p (&gt;F)</b> |
| Plant                     | 4         | 235.27                  | 58.82                   | 72.52          | < 0.001 ***      |
| Sampling place            | 1         | 634.75                  | 634.75                  | 782.61         | < 0.001 ***      |
| Plant to Sampling place   | 4         | 279.35                  | 69.84                   | 86.11          | < 0.001 ***      |
| Residuals                 | 80        | 64.89                   | 0.81                    |                |                  |
| <b>Response: Phos</b>     | <b>Df</b> | <b>Sum Sq</b>           | <b>Mean Sq</b>          | <b>F value</b> | <b>p (&gt;F)</b> |
| Plant                     | 4         | 9154                    | 2289                    | 36.239         | < 0.001 ***      |
| Sampling place            | 1         | 56974                   | 56974                   | 299.33         | < 0.001 ***      |
| Plant to Sampling place   | 4         | 12214                   | 3031                    | 47.995         | < 0.001 ***      |
| Residuals                 | 80        | 5052                    | 63                      |                |                  |
| <b>Response: NAG</b>      | <b>Df</b> | <b>Sum Sq</b>           | <b>Mean Sq</b>          | <b>F value</b> | <b>p (&gt;F)</b> |
| Plant                     | 4         | 384.18                  | 96.04                   | 57.956         | < 0.001 ***      |
| Sampling place            | 1         | 1811.46                 | 1811.46                 | 1093.079       | < 0.001 ***      |
| Plant to Sampling place   | 4         | 482.25                  | 120.56                  | 72.751         | < 0.001 ***      |
| Residuals                 | 80        | 132.58                  | 1.66                    |                |                  |
| <b>Response: Glu</b>      | <b>Df</b> | <b>Sum Sq</b>           | <b>Mean Sq</b>          | <b>F value</b> | <b>p (&gt;F)</b> |
| Plant                     | 4         | 4321.7                  | 1080.4                  | 56.611         | < 0.001 ***      |
| Sampling place            | 1         | 18218.8                 | 18218.8                 | 954.628        | < 0.001 ***      |
| Plant to Sampling place   | 4         | 6598.1                  | 1649.5                  | 86.431         | < 0.001 ***      |
| Residuals                 | 80        | 1526.8                  | 19.1                    |                |                  |
| <b>Response: 16S rDNA</b> | <b>Df</b> | <b>Sum Sq</b>           | <b>Mean Sq</b>          | <b>F value</b> | <b>p (&gt;F)</b> |
| Plant                     | 4         | 1.8602·10 <sup>23</sup> | 4.6505·10 <sup>22</sup> | 145.764        | < 0.001 ***      |
| Sampling place            | 1         | 1.5088·10 <sup>23</sup> | 1.5088·10 <sup>23</sup> | 472.918        | < 0.001 ***      |
| Plant to Sampling place   | 4         | 1.0452·10 <sup>23</sup> | 2.6131·10 <sup>22</sup> | 81.904         | < 0.001 ***      |
| Residuals                 | 80        | 2.5524·10 <sup>22</sup> | 3.1905·10 <sup>20</sup> |                |                  |
| <b>Response: 18S rDNA</b> | <b>Df</b> | <b>Sum Sq</b>           | <b>Mean Sq</b>          | <b>F value</b> | <b>p (&gt;F)</b> |
| Plant                     | 4         | 4.0461·10 <sup>15</sup> | 1.0115·10 <sup>15</sup> | 202.632        | < 0.001 ***      |
| Sampling place            | 1         | 3.0200·10 <sup>15</sup> | 3.0200·10 <sup>15</sup> | 604.97         | < 0.001 ***      |
| Plant to Sampling place   | 4         | 1.8574·10 <sup>15</sup> | 4.6436·10 <sup>14</sup> | 93.023         | < 0.001 ***      |
| Residuals                 | 80        | 3.9935·10 <sup>14</sup> | 4.9919·10 <sup>12</sup> |                |                  |
| <b>Response: nirS</b>     | <b>Df</b> | <b>Sum Sq</b>           | <b>Mean Sq</b>          | <b>F value</b> | <b>p (&gt;F)</b> |

|                         |    |                        |                        |         |             |
|-------------------------|----|------------------------|------------------------|---------|-------------|
| Plant                   | 4  | $5.4667 \cdot 10^{13}$ | $1.3667 \cdot 10^{13}$ | 176.451 | < 0.001 *** |
| Sampling place          | 1  | $1.8261 \cdot 10^{13}$ | $1.8261 \cdot 10^{13}$ | 235.773 | < 0.001 *** |
| Plant to Sampling place | 4  | $1.5121 \cdot 10^{13}$ | $3.7804 \cdot 10^{12}$ | 48.808  | < 0.001 *** |
| Residuals               | 80 | $6.1962 \cdot 10^{12}$ | $7.7453 \cdot 10^{10}$ |         |             |

| <b>Response: ALPS</b>   | <b>Df</b> | <b>Sum Sq</b>          | <b>Mean Sq</b>         | <b>F value</b> | <b>p (&gt;F)</b> |
|-------------------------|-----------|------------------------|------------------------|----------------|------------------|
| Plant                   | 4         | $1.2259 \cdot 10^{14}$ | $3.0649 \cdot 10^{13}$ | 166.88         | < 0.001 ***      |
| Sampling place          | 1         | $1.9729 \cdot 10^{14}$ | $1.9729 \cdot 10^{14}$ | 1074.23        | < 0.001 ***      |
| Plant to Sampling place | 4         | $1.3878 \cdot 10^{14}$ | $3.4695 \cdot 10^{13}$ | 188.91         | < 0.001 ***      |
| Residuals               | 80        | $1.4693 \cdot 10^{13}$ | $1.8366 \cdot 10^{11}$ |                |                  |

| <b>Response: AOB</b>    | <b>Df</b> | <b>Sum Sq</b>          | <b>Mean Sq</b>         | <b>F value</b> | <b>p (&gt;F)</b> |
|-------------------------|-----------|------------------------|------------------------|----------------|------------------|
| Plant                   | 4         | $1.8040 \cdot 10^{13}$ | $4.51 \cdot 10^{12}$   | 381.32         | < 0.001 ***      |
| Sampling place          | 1         | $1.7023 \cdot 10^{13}$ | $1.7023 \cdot 10^{13}$ | 1439.27        | < 0.001 ***      |
| Plant to Sampling place | 4         | $2.576 \cdot 10^{13}$  | $6.4399 \cdot 10^{12}$ | 544.49         | < 0.001 ***      |
| Residuals               | 80        | $9.4619 \cdot 10^{11}$ | $1.1827 \cdot 10^{10}$ |                |                  |
